# Supplementary material for: Quality and safety indicators for home care recipients in Australia: development and cross-sectional analyses
Source: HighWire-hosted journal article supplement (doi:10.1136/bmjopen-2022-063152), 2022-08-01

**Appendix 1.**

Figure A1 Sedative load, Overall

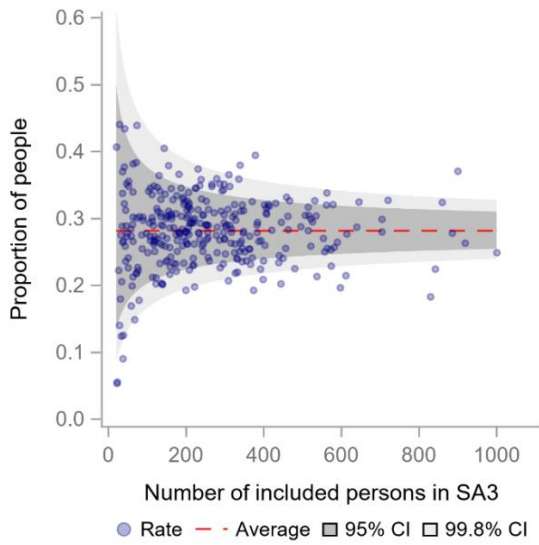

Figure A4 Antipsychotics, Overall

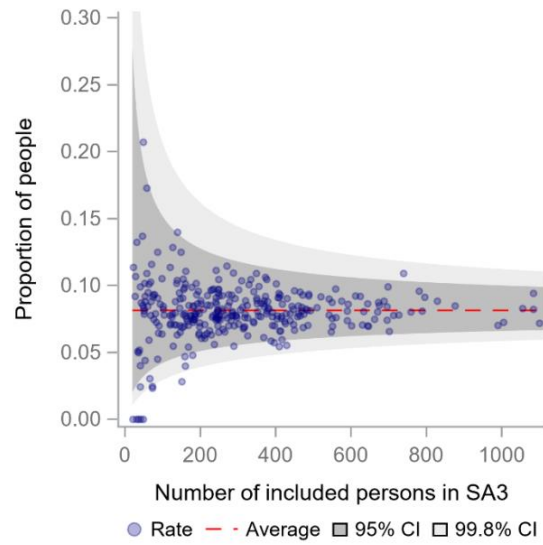

Figure A2 Sedative load, Level 1-2 HCP

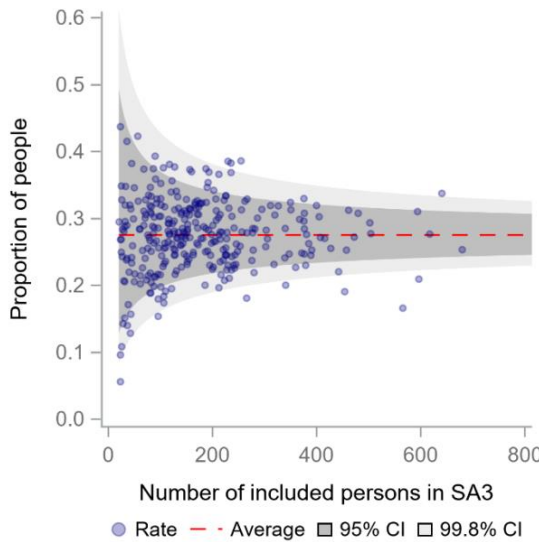

Figure A5 Antipsychotics, Level 1-2 HCP

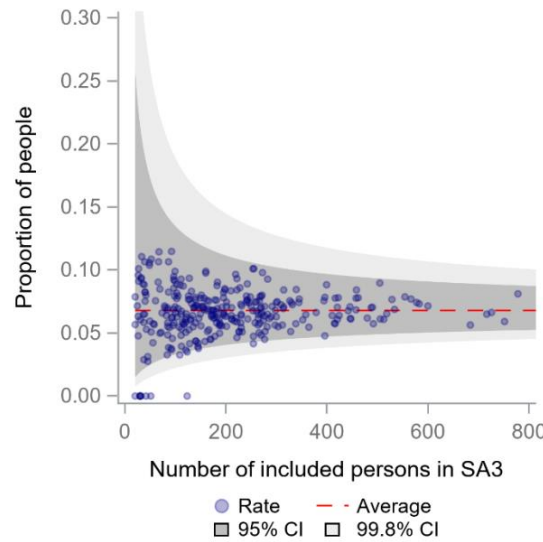

Figure A3 Sedative load, Level 3-4 HCP

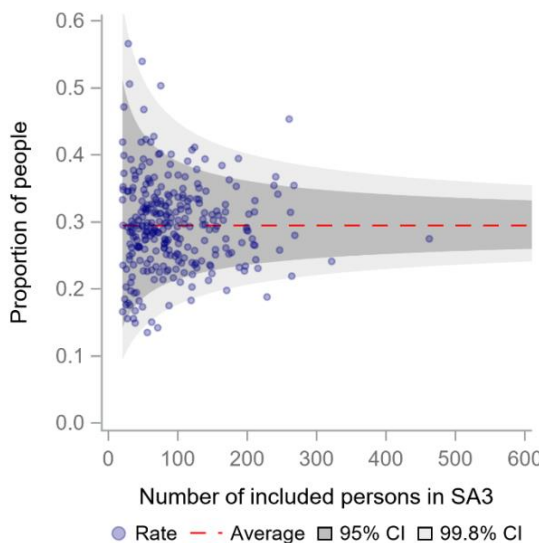

Figure A6 Antipsychotics, Level 3-4 HCP

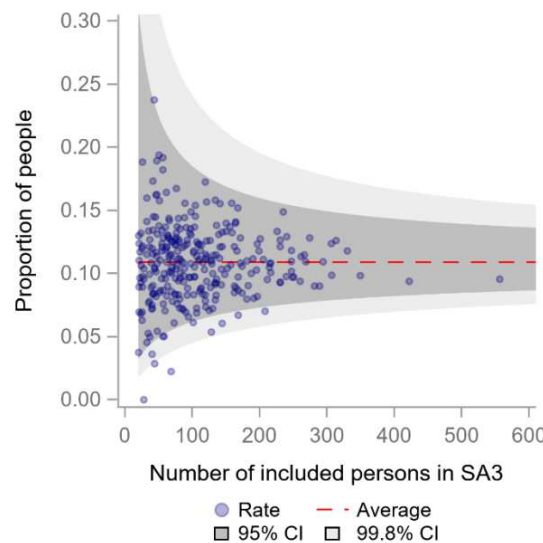

Figure A7 Chronic Opioid use, Overall

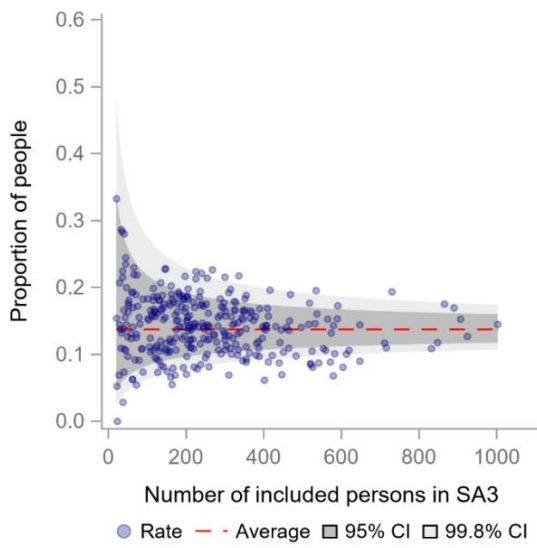

Figure A10 Antimicrobial use, Overall

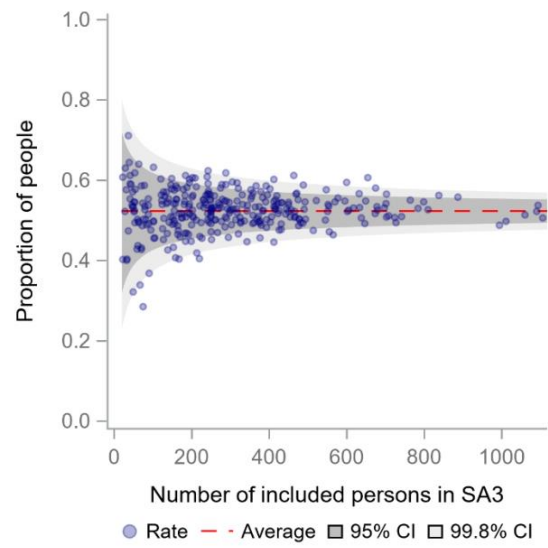

Figure A8 Chronic Opioid use, Level 1-2 HCP

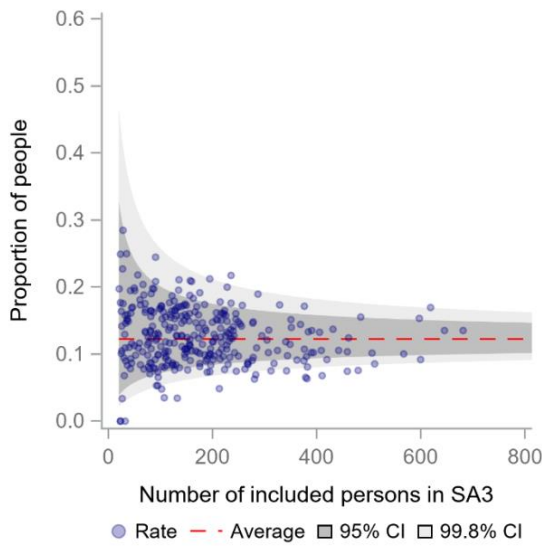

Figure A11 Antimicrobial use, Level 1-2 HCP

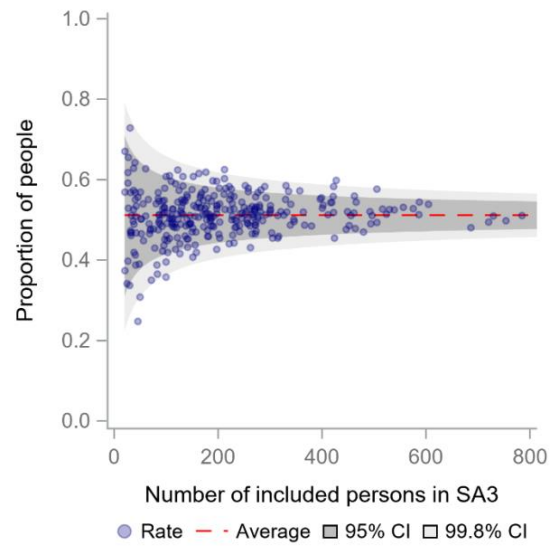

Figure A9 Chronic Opioid use, Level 3-4 HCP

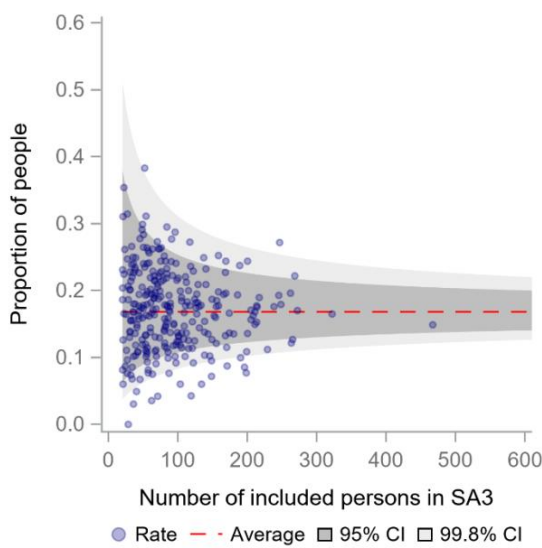

Figure A12 Antimicrobial use, Level 3-4 HCP

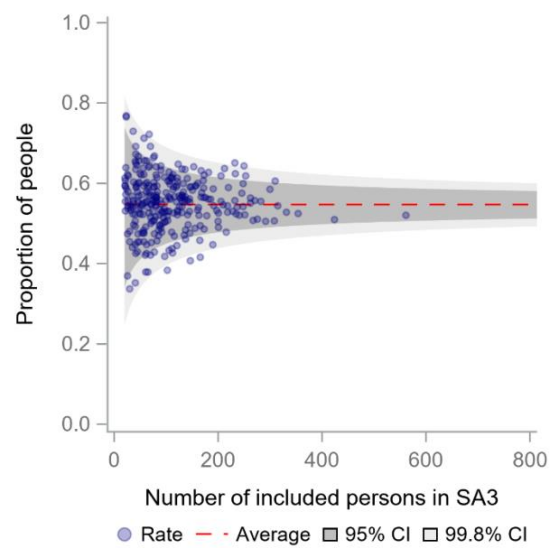

Figure A13 Premature Mortality, Overall

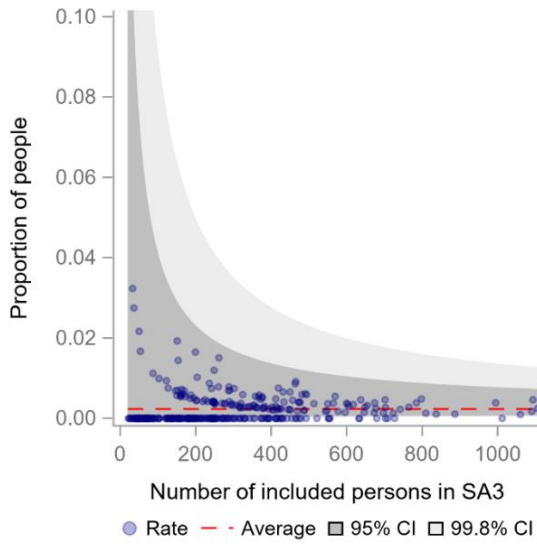

Figure A16 Falls, Overall

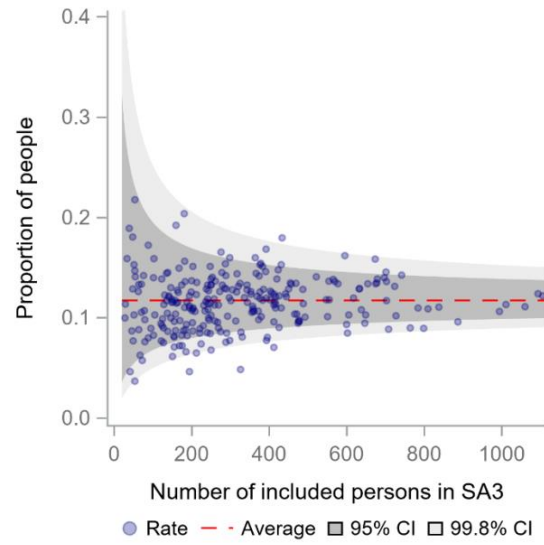

Figure A14 Premature Mortality, Level 1-2 HCP

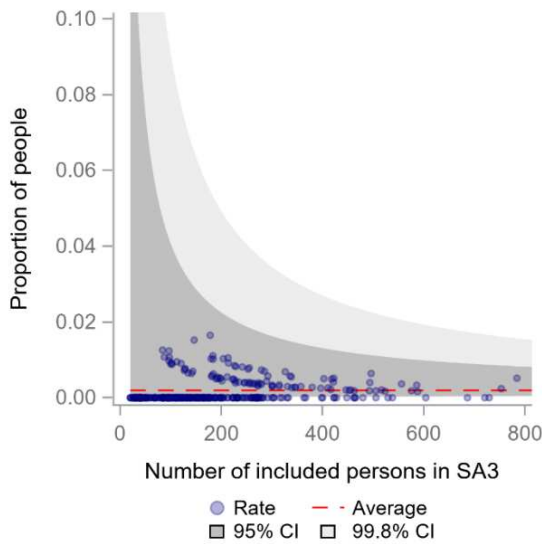

Figure A17 Falls, Level 1-2 HCP

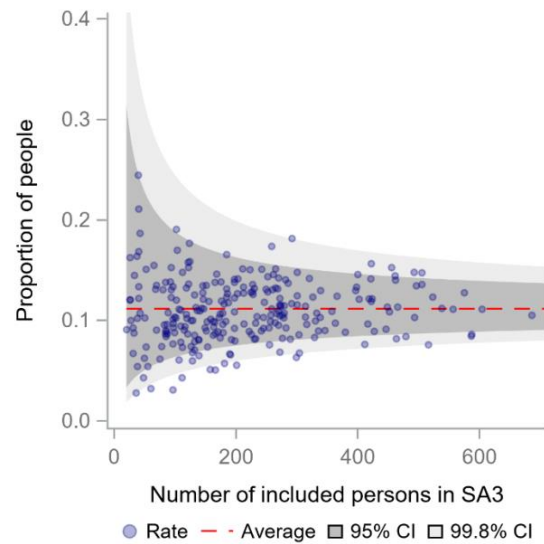

Figure A15 Premature Mortality, Level 3-4 HCP

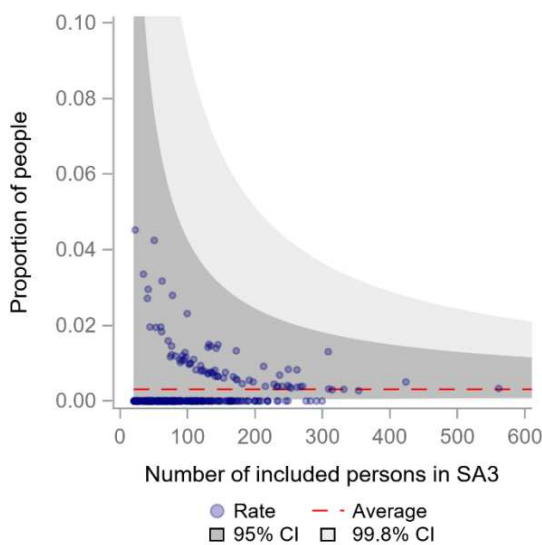

Figure A18 Falls, Level 3-4 HCP

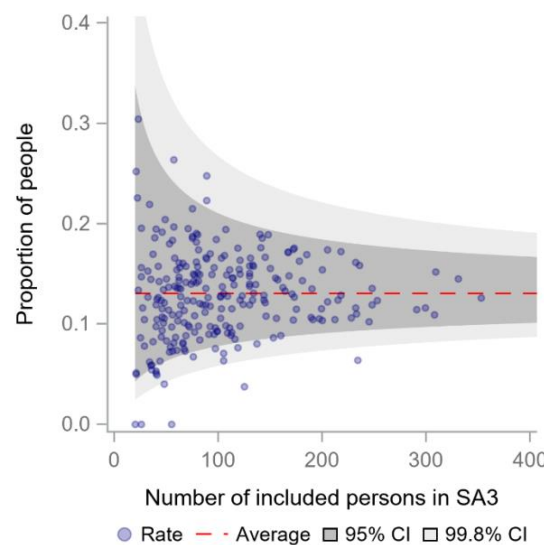

Figure A19 Fractures, Overall

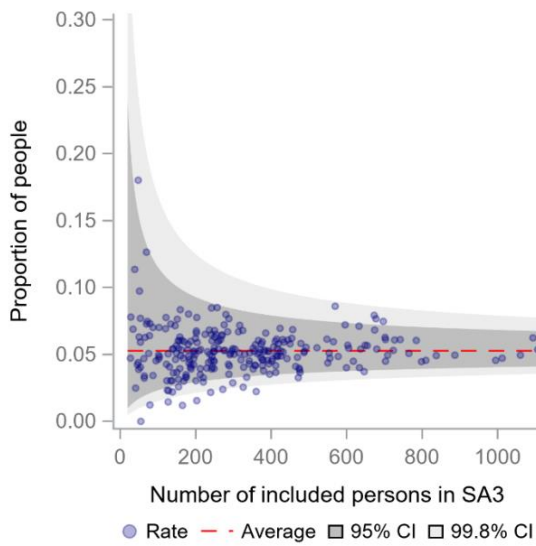

Figure A22 Medication-related adverse events, Overall

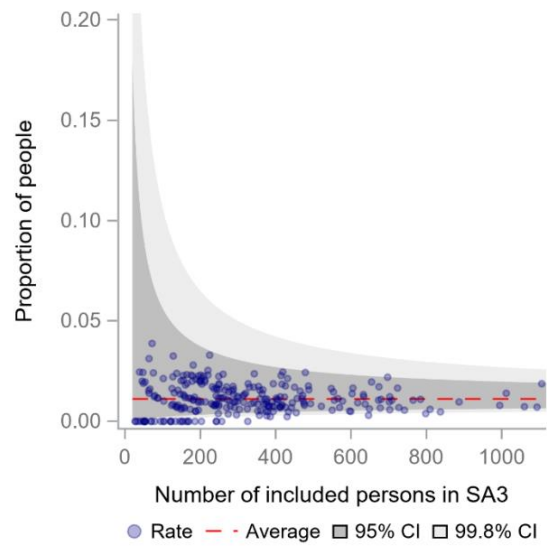

Figure A20 Fractures, Level 1-2 HCP

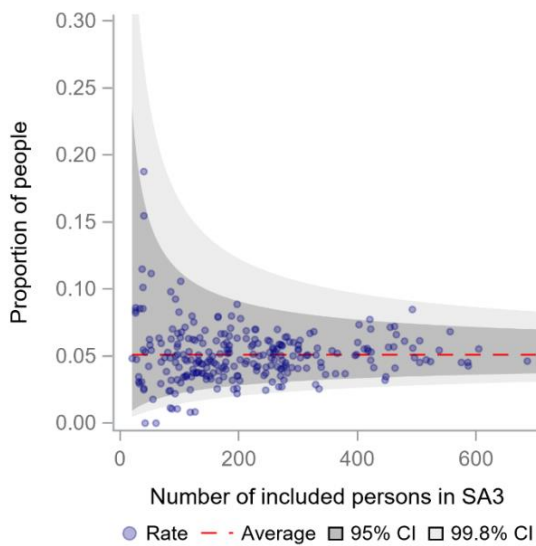

Figure A23 Medication-related adverse events, Level 1-2 HCP

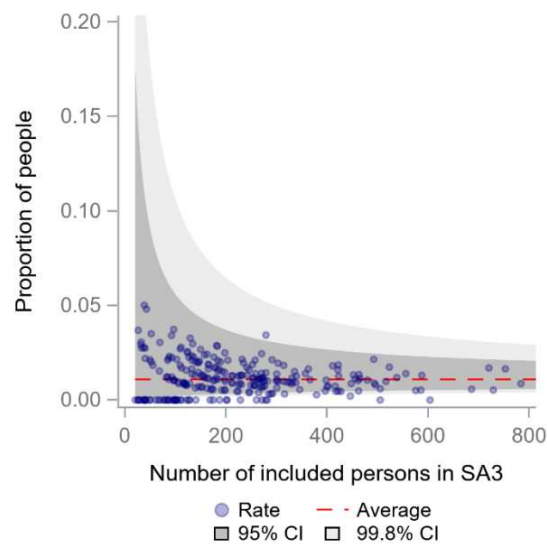

Figure A21 Fractures, Level 3-4 HCP

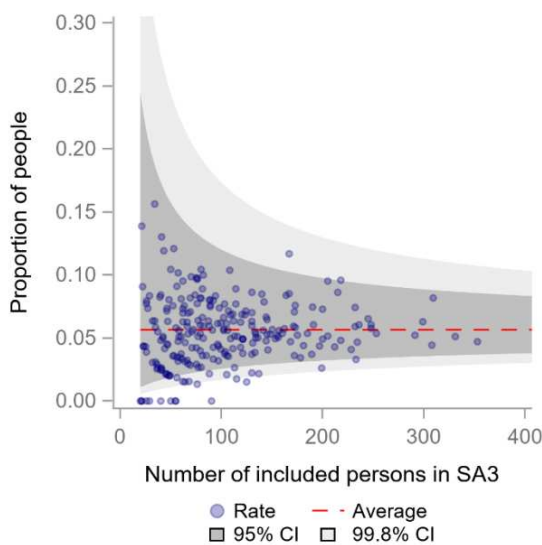

Figure A24 Medication-related adverse events Level 3-4 HCP

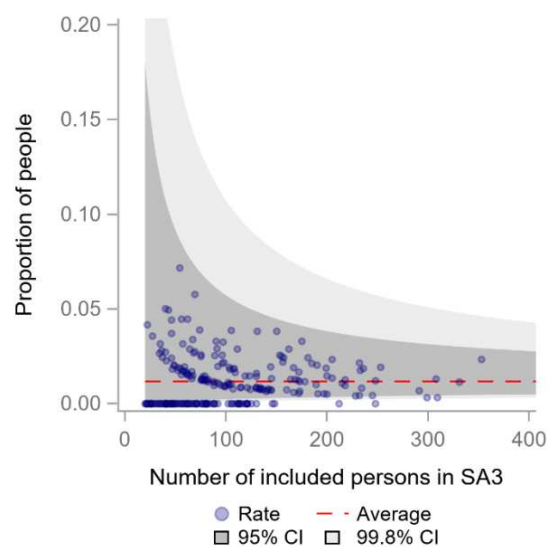

Figure A25 Malnutrition and weight loss, Overall

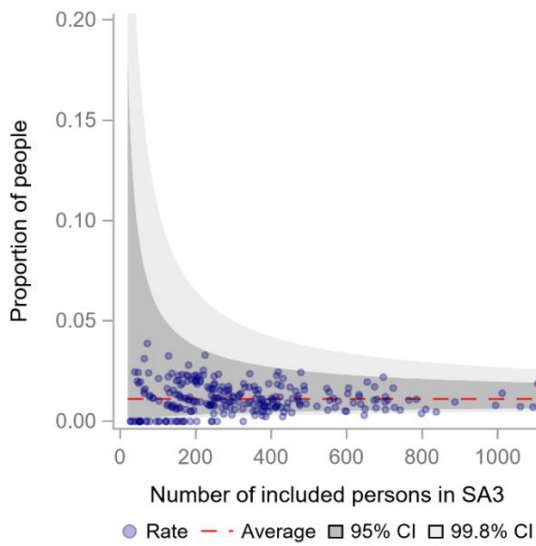

Figure A28 Dementia Hospitalisations, Overall

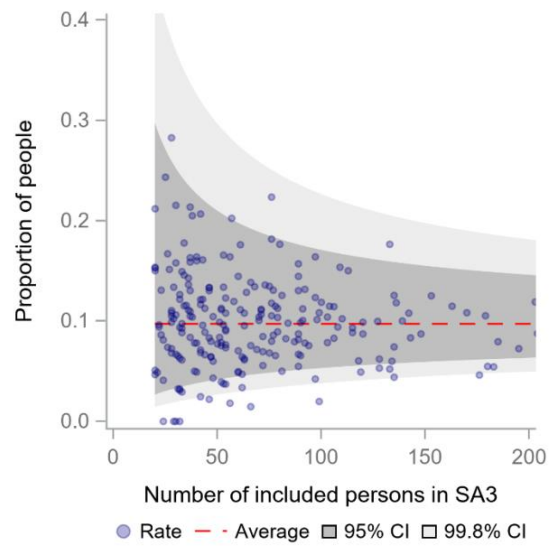

Figure A26 Malnutrition and weight loss, Level 1-2 HCP

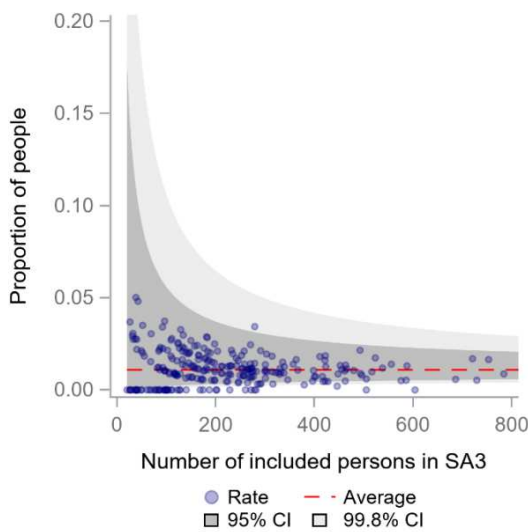

Figure A29 Dementia Hospitalisations, Level 1-2 HCP

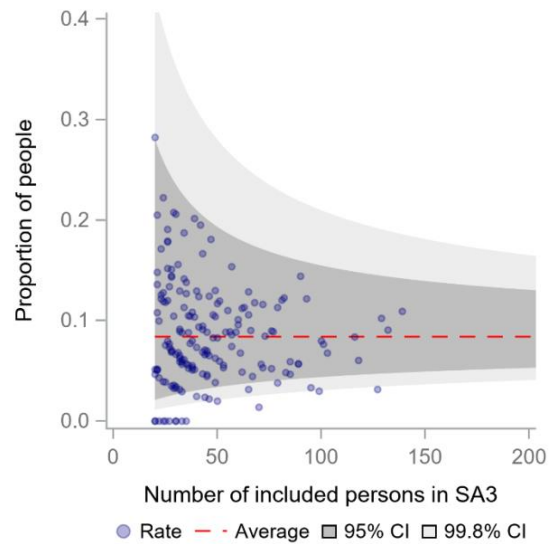

Figure A27 Malnutrition and weight loss, Level 3-4 HCP

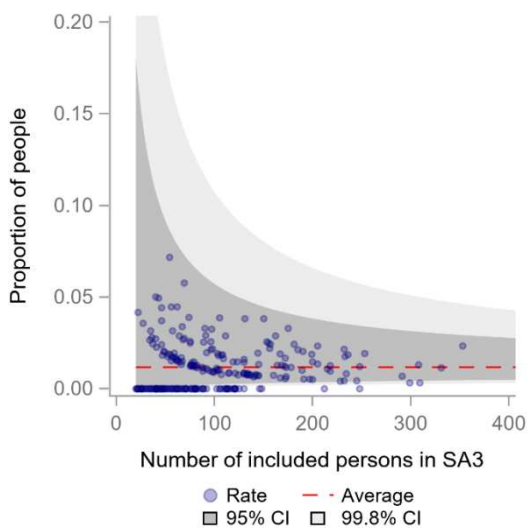

Figure A30 Dementia Hospitalisations, Level 3-4 HCP

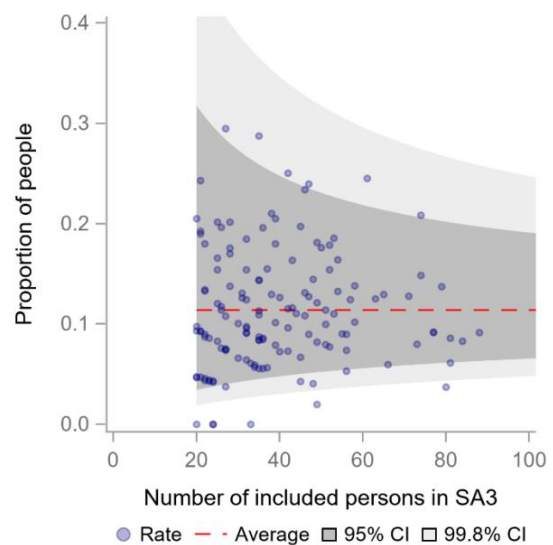

Figure A31 Emergency department presentations within 30 days of hospital discharge, Overall

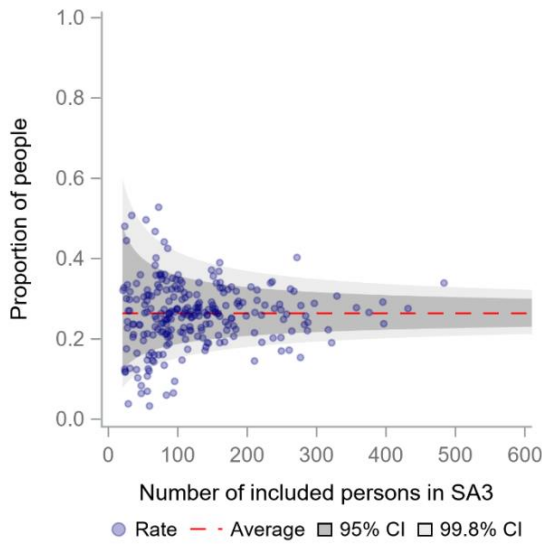

Figure A34 Pressure injury, Overall

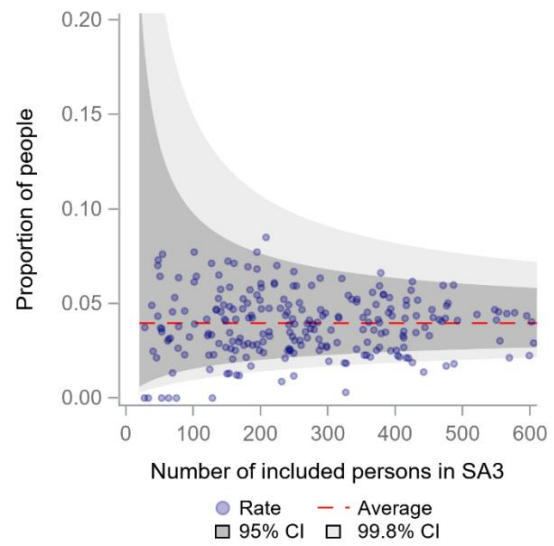

Figure A32 Emergency department presentations within 30 days of hospital discharge, Level 1-2 HCP

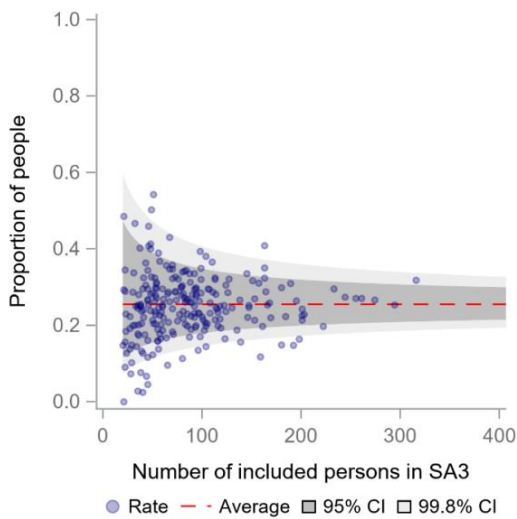

Figure A35 Pressure injury, Level 1-2 HCP

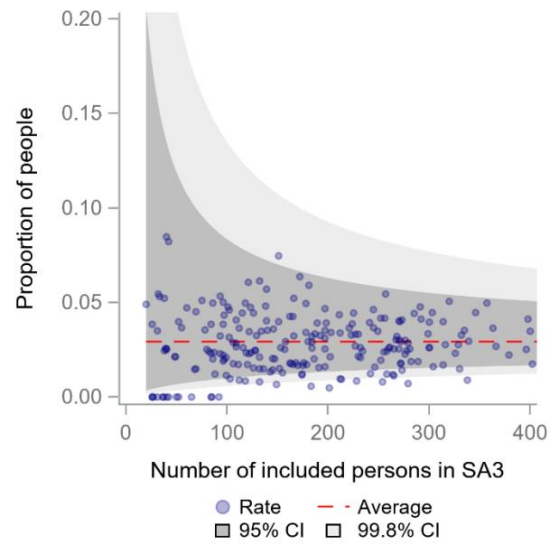

Figure A33 Emergency department presentations within 30 days of hospital discharge, Level 3-4 HCP

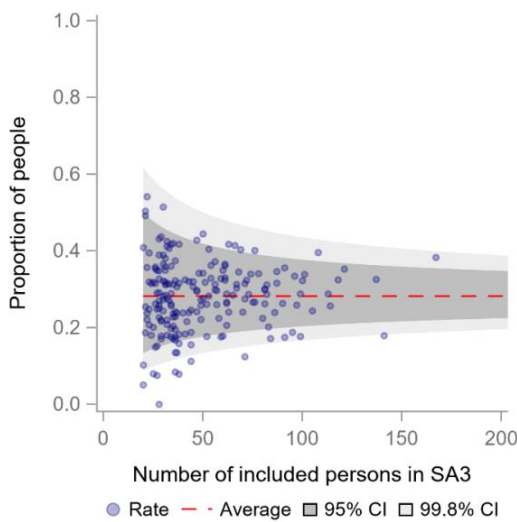

Figure A36 Pressure injury, Level 3-4 HCP

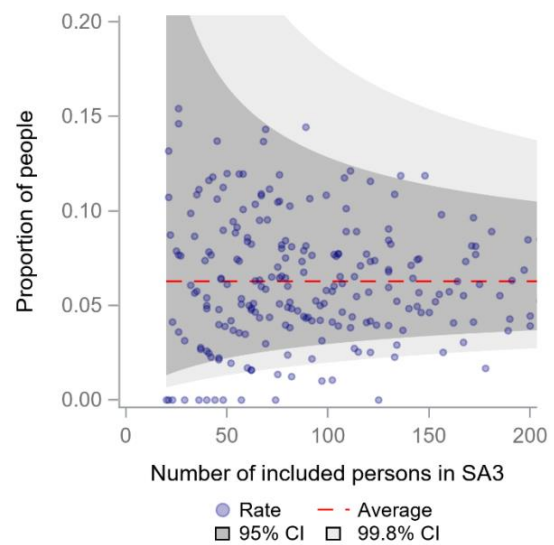

Figure A37 Chronic Disease Management Plan, Overall

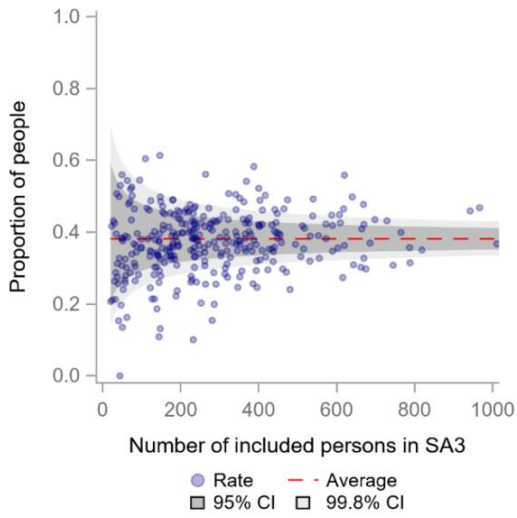

Figure A40 Home Medication Review, Overall

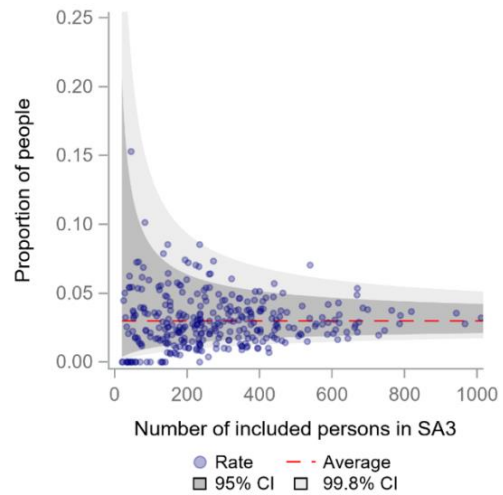

Figure A38 Chronic Disease Management Plan, Level 1-2 HCP

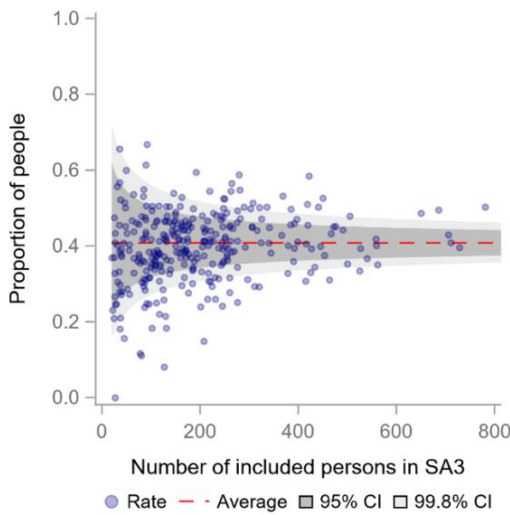

Figure A41 Home Medication Review, Level 1-2 HCP

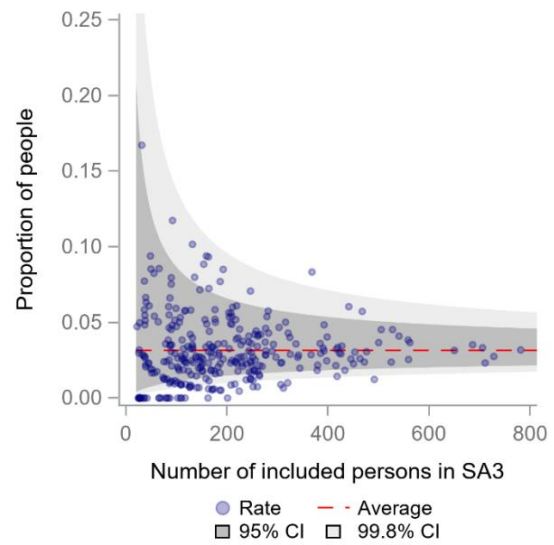

Figure A39 Chronic Disease Management Plan, Level 3-4 HCP

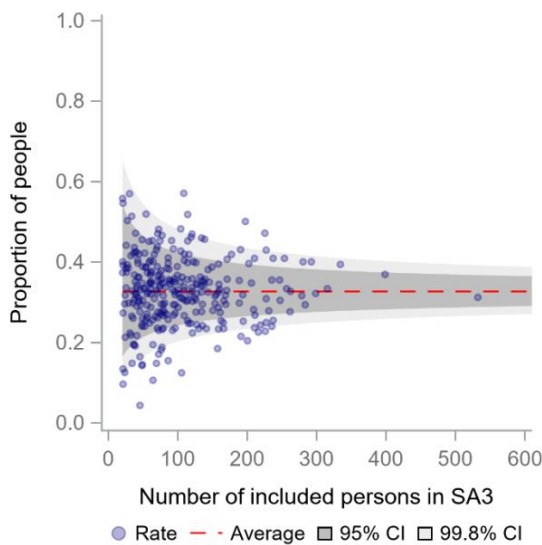

Figure A42 Home Medication Review, Level 3-4 HCP

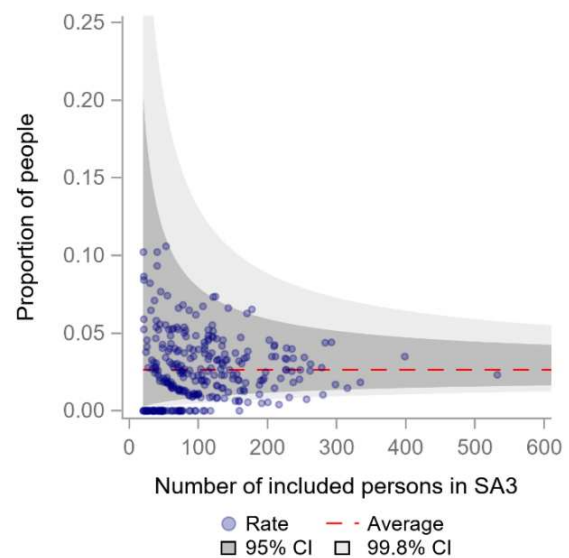

Figure A43 Wait time>90 days, Overall

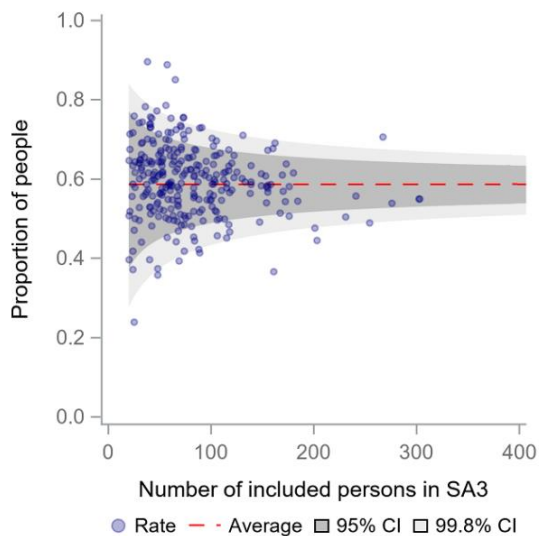

Figure A44 Wait time>90 days, Level 1-2 HCP

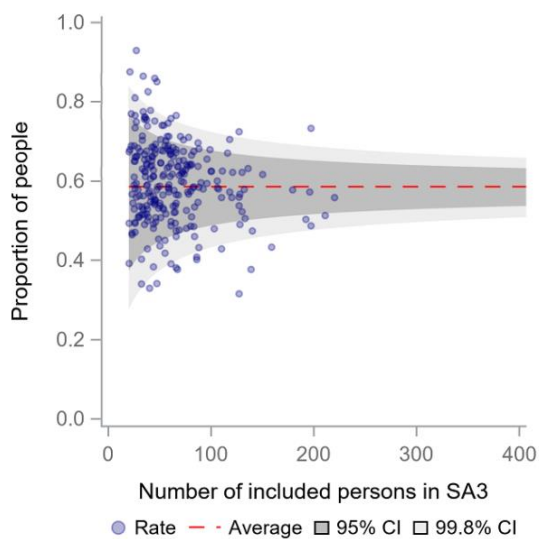

Figure A45 Wait time>90 days, Level 3-4 HCP

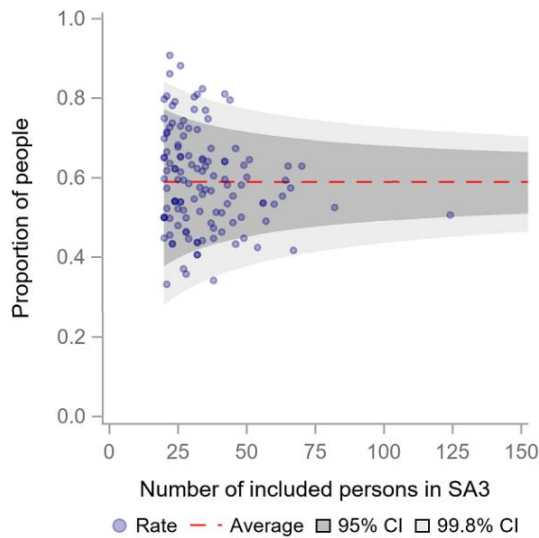

Supplement: bmjopen-2022-063152supp001_data_supplement.pdf [file bmjopen-2022-063152supp001_data_supplement.pdf]
